# Supplementary material
Source: HighWire-hosted journal article supplement (https://jech.bmj.com/content/72/4/324)
Supplement: inline-supplementary-material-2 [file inline-supplementary-material-2.pdf]

Table 1 Uncompensated own- and cross-price elasticities for whole sample

|                              | High sugar soft drinks        | Medium sugar soft drinks      | Low sugar & diet soft drinks  | Fruit juices                  | Milk-based drinks             | Water                         | Beer                          | Lager                         | Cider                         | Wines                         | Spirits                       |
|------------------------------|-------------------------------|-------------------------------|-------------------------------|-------------------------------|-------------------------------|-------------------------------|-------------------------------|-------------------------------|-------------------------------|-------------------------------|-------------------------------|
| High sugar soft drinks       | <b>-0.7</b><br>[-0.76; -0.63] | <b>-0.04</b><br>[-0.07;-0.02] | 0.01<br>[-0.04;0.09]          | <b>0.13</b><br>[0.05;0.19]    | 0.02<br>[-0.01;0.06]          | 0.02<br>[-0.01;0.05]          | 0.01<br>[-0.03;0.04]          | <b>0.08</b><br>[0.03;0.13]    | 0.01<br>[-0.02;0.05]          | <b>-0.12</b><br>[-0.18;-0.04] | -0.01<br>[-0.05;0.03]         |
| Medium sugar soft drinks     | <b>-0.24</b><br>[-0.43;-0.09] | <b>-0.75</b><br>[-0.81;-0.68] | 0.09<br>[-0.06;0.28]          | -0.14<br>[-0.30;0.10]         | 0.03<br>[-0.06;0.11]          | 0.03<br>[-0.05;0.12]          | -0.07<br>[-0.18;0.05]         | 0.07<br>[-0.07;0.20]          | 0.03<br>[-0.08;0.11]          | <b>0.21</b><br>[0.02;0.41]    | -0.03<br>[-0.11;0.11]         |
| Low sugar & diet soft drinks | <b>0.06</b><br>[0.02;0.10]    | -0.01<br>[-0.03;0.01]         | <b>-0.61</b><br>[-0.66;-0.56] | <b>0.07</b><br>[0.01;0.11]    | 0.02<br>[0;0.04]              | <b>0.0</b><br>[0.01;0.05]     | 0.01<br>[-0.02;0.04]          | <b>0.08</b><br>[0.05;0.12]    | -0.01<br>[-0.03;0.02]         | <b>0.06</b><br>[0.01;0.11]    | 0.01<br>[-0.02;0.03]          |
| Fruit juices                 | <b>0.15</b><br>[0.08;0.21]    | <b>-0.09</b><br>[-0.11;0.07]  | <b>0.13</b><br>[0.03;0.19]    | <b>-0.55</b><br>[-0.61;-0.44] | <b>-0.05</b><br>[-0.09;-0.02] | 0.04<br>[0;0.06]              | -0.02<br>[-0.06;0.02]         | 0.06<br>[-0.01;0.12]          | 0.03<br>[-0.02;0.08]          | <b>-0.3</b><br>[-0.38;-0.23]  | -0.03<br>[-0.07;0.01]         |
| Milk-based drinks            | -0.19<br>[-0.43;0.01]         | -0.06<br>[-0.14;0.02]         | <b>0.69</b><br>[0.50;0.91]    | -0.22<br>[-0.45;0.01]         | <b>-1.01</b><br>[-1.12;-0.91] | -0.08<br>[-0.16;0.01]         | -0.04<br>[-0.20;0.10]         | 0.02<br>[-0.16;0.18]          | -0.14<br>[-0.23;0.01]         | 0.03<br>[-0.24;0.26]          | 0.02<br>[-0.11;0.17]          |
| Water                        | 0.07<br>[-0.10;0.21]          | <b>-0.11</b><br>[-0.17;-0.06] | <b>0.4</b><br>[0.26;0.57]     | <b>0.17</b><br>[0.02;0.33]    | 0<br>[-0.06;0.07]             | <b>-0.79</b><br>[-0.87;-0.73] | -0.08<br>[-0.17;0.03]         | -0.01<br>[-0.14;0.12]         | <b>-0.11</b><br>[-0.20;-0.02] | <b>-0.31</b><br>[-0.49;-0.11] | 0.07<br>[-0.03;0.18]          |
| Beer                         | 0.13<br>[-0.01;0.29]          | <b>-0.12</b><br>[-0.17;-0.07] | <b>0.36</b><br>[0.22;0.50]    | 0.1<br>[-0.05;0.25]           | 0.03<br>[-0.04;0.10]          | 0.03<br>[-0.05;0.08]          | <b>-1.12</b><br>[-1.21;-1.04] | -0.04<br>[-0.16;0.08]         | 0.03<br>[-0.07;0.10]          | -0.19<br>[-0.38;-0.03]        | -0.02<br>[-0.12;0.07]         |
| Lager                        | <b>0.23</b><br>[0.10;0.32]    | <b>-0.13</b><br>[-0.17;-0.10] | <b>0.27</b><br>[0.17;0.36]    | <b>0.13</b><br>[0.01;0.25]    | -0.01<br>[-0.05;0.05]         | <b>0.14</b><br>[0.09;0.18]    | <b>-0.1</b><br>[-0.17;-0.04]  | <b>-0.96</b><br>[-1.05;-0.89] | <b>0.06</b><br>[0.01;0.12]    | <b>-0.4</b><br>[-0.50;-0.27]  | 0.02<br>[-0.05;0.09]          |
| Cider                        | -0.04<br>[-0.19;0.11]         | -0.02<br>[-0.08;0.03]         | <b>0.28</b><br>[0.10;0.40]    | <b>0.21</b><br>[0.04;0.38]    | -0.02<br>[-0.09;0.05]         | <b>0.13</b><br>[0.07;0.19]    | <b>-0.14</b><br>[-0.23;-0.03] | 0.04<br>[-0.08;0.15]          | <b>-1.07</b><br>[-1.15;-0.98] | <b>-0.31</b><br>[-0.47;-0.14] | 0.11<br>[0;0.20]              |
| Wines                        | 0.03<br>[-0.02;0.08]          | <b>-0.03</b><br>[-0.04;-0.01] | <b>0.29</b><br>[0.24;0.34]    | <b>-0.08</b><br>[-0.14;-0.03] | <b>-0.03</b><br>[-0.05;-0.01] | <b>-0.04</b><br>[-0.06;-0.01] | -0.01<br>[-0.05;0.02]         | 0.01<br>[-0.04;0.05]          | <b>-0.05</b><br>[-0.07;-0.02] | <b>-0.97</b><br>[-1.03;-0.91] | -0.16<br>[-0.20;-0.14]        |
| Spirits                      | <b>-0.18</b><br>[-0.37;-0.02] | <b>0.29</b><br>[0.24;0.38]    | <b>-0.68</b><br>[-0.84;-0.54] | <b>-0.34</b><br>[-0.51;-0.17] | 0.01<br>[-0.07;0.09]          | <b>-0.21</b><br>[-0.28;-0.14] | <b>0.30</b><br>[0.20;0.41]    | <b>-0.16</b><br>[-0.27;-0.02] | <b>0.09</b><br>[0.01;0.19]    | <b>0.60</b><br>[0.46;0.81]    | <b>-1.14</b><br>[-1.25;-1.03] |

N=575,965; bias corrected 95% CI in parentheses, based on bootstrapped standard errors. Elasticities in bold mark those significant based on CI excluding zero.

Table 2 Uncompensated own- and cross-price elasticities for low-income sample

|                              | High sugar soft drinks       | Medium sugar soft drinks      | Low sugar & diet soft drinks  | Fruit juices                 | Milk-based drinks             | Water                         | Beer                          | Lager                         | Cider                         | Wines                         | Spirits                       |
|------------------------------|------------------------------|-------------------------------|-------------------------------|------------------------------|-------------------------------|-------------------------------|-------------------------------|-------------------------------|-------------------------------|-------------------------------|-------------------------------|
| High sugar soft drinks       | <b>-0.69</b><br>[-0.8;-0.59] | -0.03<br>[-0.08;0.01]         | 0.05<br>[-0.06;0.15]          | <b>0.19</b><br>[0.08;0.32]   | 0.02<br>[-0.03;0.06]          | -0.01<br>[-0.06;0.03]         | -0.01<br>[-0.07;0.05]         | 0.04<br>[-0.04;0.14]          | 0.04<br>[-0.03;0.10]          | -0.11<br>[-0.22;0.02]         | -0.06<br>[-0.12;0.02]         |
| Medium sugar soft drinks     | -0.3<br>[-0.61;0.02]         | <b>-0.73</b><br>[-0.83;-0.64] | <b>0.32</b><br>[0.06;0.67]    | -0.16<br>[-0.50;0.17]        | -0.01<br>[-0.17;0.13]         | -0.02<br>[-0.14;0.11]         | -0.09<br>[-0.31;0.07]         | 0.03<br>[-0.17;0.29]          | 0.1<br>[-0.05;0.23]           | 0.05<br>[-0.32;0.37]          | -0.02<br>[-0.19;0.16]         |
| Low sugar & diet soft drinks | <b>0.09</b><br>[0.02;0.18]   | -0.02<br>[-0.04;0.01]         | <b>-0.65</b><br>[-0.73;-0.55] | 0.06<br>[-0.04;0.14]         | 0.03<br>[-0.01;0.07]          | <b>0.04</b><br>[0.01;0.08]    | <b>0.05</b><br>[0.01;0.10]    | <b>0.11</b><br>[0.05;0.18]    | -0.02<br>[-0.06;0.03]         | <b>0.12</b><br>[0.04;0.21]    | 0.02<br>[-0.04;0.07]          |
| Fruit juices                 | <b>0.22</b><br>[0.09;0.33]   | <b>-0.1</b><br>[-0.15;-0.05]  | <b>0.32</b><br>[0.18;0.47]    | <b>-0.7</b><br>[-0.84;-0.57] | <b>-0.09</b><br>[-0.15;-0.03] | 0.04<br>[-0.03;0.09]          | -0.06<br>[-0.15;0.02]         | <b>0.11</b><br>[0.01;0.22]    | 0.06<br>[-0.01;0.13]          | <b>-0.36</b><br>[-0.49;-0.21] | <b>-0.10</b><br>[-0.18;-0.01] |
| Milk-based drinks            | -0.09<br>[-0.46;0.26]        | -0.04<br>[-0.17;0.08]         | <b>0.67</b><br>[0.37;0.94]    | -0.22<br>[-0.61;0.13]        | <b>-1.18</b><br>[-1.36;-1.02] | -0.07<br>[-0.23;0.08]         | 0<br>[-0.21;0.19]             | -0.01<br>[-0.28;0.25]         | -0.18<br>[-0.36;0.02]         | -0.02<br>[-0.36;0.32]         | 0.14<br>[-0.06;0.41]          |
| Water                        | 0.09<br>[-0.21;0.38]         | -0.07<br>[-0.17;0.03]         | <b>0.56</b><br>[0.33;0.81]    | 0.15<br>[-0.13;0.46]         | -0.07<br>[-0.18;0.09]         | <b>-0.8</b><br>[-0.91;-0.69]  | <b>-0.28</b><br>[-0.43;-0.12] | -0.03<br>[-0.20;0.22]         | 0<br>[-0.17;0.15]             | -0.2<br>[-0.51;0.10]          | -0.01<br>[-0.19;0.18]         |
| Beer                         | 0.07<br>[-0.22;0.35]         | <b>-0.15</b><br>[-0.26;-0.02] | <b>0.58</b><br>[0.26;0.86]    | 0.06<br>[-0.25;0.39]         | -0.02<br>[-0.19;0.12]         | <b>0.13</b><br>[0.02;0.25]    | <b>-1.03</b><br>[-1.23;-0.83] | -0.2<br>[-0.43;0.06]          | 0.07<br>[-0.08;0.27]          | <b>-0.37</b><br>[-0.72;-0.08] | 0.03<br>[-0.18;0.27]          |
| Lager                        | 0.18<br>[0;0.44]             | <b>-0.16</b><br>[-0.22;-0.08] | <b>0.3</b><br>[0.09;0.49]     | 0<br>[-0.19;0.22]            | 0.04<br>[-0.05;0.13]          | <b>0.11</b><br>[0.01;0.20]    | -0.04<br>[-0.18;0.09]         | <b>-0.98</b><br>[-1.14;-0.82] | 0<br>[-0.10;0.10]             | <b>-0.41</b><br>[-0.63;-0.18] | <b>0.18</b><br>[0.06;0.33]    |
| Cider                        | 0.02<br>[-0.30;0.29]         | -0.02<br>[-0.13;0.07]         | <b>0.4</b><br>[0.17;0.68]     | <b>0.37</b><br>[0.07;0.69]   | -0.02<br>[-0.14;0.13]         | 0.01<br>[-0.12;0.15]          | <b>-0.29</b><br>[-0.47;-0.12] | 0.1<br>[-0.08;0.33]           | <b>-1.27</b><br>[-1.43;-1.13] | -0.24<br>[-0.50;0.04]         | 0.14<br>[-0.06;0.37]          |
| Wines                        | 0.03<br>[-0.05;0.13]         | -0.04<br>[-0.08;0]            | <b>0.29</b><br>[0.20;0.38]    | -0.05<br>[-0.15;0.05]        | -0.04<br>[-0.08;0]            | -0.01<br>[-0.05;0.04]         | -0.02<br>[-0.09;0.04]         | 0.04<br>[-0.04;0.11]          | -0.03<br>[-0.10;0.02]         | <b>-1.11</b><br>[-1.21;-1.02] | <b>-0.14</b><br>[-0.21;-0.07] |
| Spirits                      | -0.20<br>[-0.58;0.07]        | <b>0.30</b><br>[0.17;0.30]    | <b>-0.87</b><br>[-1.19;-0.62] | -0.31<br>[-0.63;0.03]        | 0.12<br>[-0.01;0.30]          | <b>-0.21</b><br>[-0.34;-0.08] | <b>0.37</b><br>[0.19;0.55]    | -0.13<br>[-0.36;0.10]         | 0.14<br>[-0.02;0.33]          | <b>0.77</b><br>[0.47;1.07]    | <b>-1.29</b><br>[-1.52;-1.11] |

N=198,464; bias corrected 95% CI in parentheses, based on bootstrapped standard errors. Elasticities in bold mark those significant based on CI excluding zero.

Table 1.3 Uncompensated own- and cross-price elasticities for middle income sample

|                              | High sugar soft drinks              | Medium sugar soft drinks            | Low sugar & diet soft drinks        | Fruit juices                        | Milk-based drinks             | Water                               | Beer                                | Lager                               | Cider                         | Wines                               | Spirits                       |
|------------------------------|-------------------------------------|-------------------------------------|-------------------------------------|-------------------------------------|-------------------------------|-------------------------------------|-------------------------------------|-------------------------------------|-------------------------------|-------------------------------------|-------------------------------|
| High sugar soft drinks       | <b>-0.76</b><br>[-0.86;-0.68]       | <b>-0.04</b><br>[-0.8;-0.12]        | 0.02<br>[-0.07;0.10]                | <b>0.11</b><br>[0.03;0.21]          | 0<br>[-0.04;0.04]             | 0.02<br>[-0.01;0.06]                | 0.03<br>[-0.03;0.09]                | <b>0.11</b><br>[ <b>0.02;0.18</b> ] | 0<br>[-0.05;0.04]             | -0.1<br>[-0.05;0.04]                | 0.01<br>[-0.04;0.09]          |
| Medium sugar soft drinks     | -0.17<br>[-0.41;0.03]               | <b>-0.77</b><br>[-0.87;-0.67]       | -0.1<br>[-0.28;0.15]                | -0.1<br>[-0.38;0.20]                | 0.06<br>[-0.07;0.19]          | 0.02<br>[-0.09;0.12]                | -0.12<br>[-0.27;0.02]               | 0.12<br>[-0.06;0.36]                | 0.01<br>[-0.14;0.15]          | <b>0.42</b><br>[ <b>0.15;0.71</b> ] | -0.11<br>[-0.27;0.09]         |
| Low sugar & diet soft drinks | 0.04<br>[-0.01;0.11]                | -0.02<br>[-0.05;0]                  | <b>-0.62</b><br>[-0.69;-0.56]       | <b>0.1</b><br>[ <b>0.03;0.17</b> ]  | 0.02<br>[-0.01;0.05]          | 0.04<br>[0;0.06]                    | -0.01<br>[-0.06;0.03]               | <b>0.07</b><br>[ <b>0.02;0.13</b> ] | 0.01<br>[-0.03;0.04]          | <b>0.07</b><br>[0.01;0.14]          | 0.03<br>[-0.01;0.07]          |
| Fruit juices                 | 0.1<br>[0;0.21]                     | <b>-0.08</b><br>[-0.12;-0.05]       | <b>0.12</b><br>[ <b>0.03;0.23</b> ] | <b>-0.51</b><br>[-0.64;-0.40]       | -0.04<br>[-0.09;0]            | <b>0.06</b><br>[ <b>0.02;0.10</b> ] | -0.01<br>[-0.07;0.05]               | 0.02<br>[-0.05;0.10]                | 0.03<br>[-0.02;0.08]          | <b>-0.27</b><br>[-0.37;-0.16]       | -0.01<br>[-0.09;0.05]         |
| Milk-based drinks            | -0.23<br>[-0.50;0.05]               | -0.07<br>[-0.19;0.04]               | <b>0.75</b><br>[ <b>0.40;1.04</b> ] | -0.22<br>[-0.61;0.14]               | <b>-0.98</b><br>[-1.13;-0.84] | <b>-0.15</b><br>[-0.28;-0.01]       | -0.07<br>[-0.25;0.13]               | 0.13<br>[-0.12;0.32]                | -0.13<br>[-0.26;0.02]         | 0.04<br>[-0.30;0.38]                | -0.03<br>[-0.20;0.16]         |
| Water                        | 0.15<br>[-0.05;0.38]                | <b>-0.18</b><br>[-0.26;-0.10]       | <b>0.26</b><br>[ <b>0.06;0.45</b> ] | 0.24<br>[-0.02;0.46]                | 0.06<br>[-0.06;0.16]          | <b>-0.75</b><br>[-0.84;-0.65]       | 0.07<br>[-0.07;0.22]                | -0.07<br>[-0.07;0.22]               | <b>-0.18</b><br>[-0.30;-0.04] | <b>-0.34</b><br>[-0.60;-0.14]       | 0.02<br>[-0.08;0.21]          |
| Beer                         | 0.08<br>[-0.12;0.30]                | <b>-0.12</b><br>[-0.18;-0.04]       | <b>0.29</b><br>[ <b>0.10;0.46</b> ] | 0.05<br>[-0.12;0.29]                | 0.06<br>[-0.03;0.14]          | -0.01<br>[-0.11;0.05]               | <b>-1.19</b><br>[-1.31;-1.04]       | 0.04<br>[-0.09;0.20]                | 0<br>[-0.11;0.10]             | -0.03<br>[-0.26;0.21]               | 0.03<br>[-0.08;0.20]          |
| Lager                        | <b>0.26</b><br>[ <b>0.15;0.40</b> ] | <b>-0.12</b><br>[-0.17;-0.08]       | <b>0.28</b><br>[ <b>0.13;0.42</b> ] | <b>0.16</b><br>[ <b>0.04;0.32</b> ] | <b>-0.07</b><br>[-0.13;-0.01] | <b>0.14</b><br>[ <b>0.08;0.20</b> ] | <b>-0.15</b><br>[-0.24;-0.06]       | <b>-0.91</b><br>[-1.02;-0.81]       | 0.07<br>[0;0.16]              | <b>-0.34</b><br>[-0.48;-0.19]       | -0.06<br>[-0.14;0.04]         |
| Cider                        | 0.05<br>[-0.13;0.27]                | -0.03<br>[-0.1;0.04]                | <b>0.26</b><br>[ <b>0.09;0.45</b> ] | 0.17<br>[-0.07;0.39]                | -0.02<br>[-0.13;0.11]         | <b>0.18</b><br>[ <b>0.09;0.27</b> ] | -0.07<br>[-0.19;0.05]               | -0.02<br>[-0.18;0.15]               | <b>-1.03</b><br>[-1.11;-0.90] | -0.41<br>[-0.65;-0.20]              | 0.08<br>[-0.06;0.21]          |
| Wines                        | 0.05<br>[-0.01;0.12]                | -0.02<br>[-0.04;0.01]               | <b>0.3</b><br>[ <b>0.23;0.37</b> ]  | <b>-0.1</b><br>[-0.19;-0.03]        | -0.01<br>[-0.04;0.02]         | <b>-0.05</b><br>[-0.07;-0.02]       | 0<br>[-0.05;0.04]                   | -0.01<br>[-0.06;0.05]               | <b>-0.06</b><br>[-0.09;0.02]  | <b>-0.99</b><br>[-1.05;-0.91]       | <b>-0.12</b><br>[-0.17;-0.08] |
| Spirits                      | <b>-0.22</b><br>[-0.38;-0.02]       | <b>0.33</b><br>[ <b>0.24;0.40</b> ] | <b>-0.58</b><br>[-0.80;-0.37]       | <b>-0.33</b><br>[-0.61;-0.15]       | -0.01<br>[-0.1;0.11]          | <b>-0.23</b><br>[-0.34;-0.15]       | <b>0.32</b><br>[ <b>0.19;0.46</b> ] | <b>-0.21</b><br>[-0.40;-0.06]       | 0.12<br>[0;0.25]              | <b>0.50</b><br>[ <b>0.21;0.68</b> ] | <b>-1.10</b><br>[-1.27;-0.97] |

N=287,966; bias corrected 95% CI in parentheses, based on bootstrapped standard errors. Elasticities in bold mark those significant based on CI excluding zero.

Table Error! No text of specified style in document. Uncompensated own- and cross-price elasticities for high income sample

|                              | High sugar soft drinks        | Medium sugar soft drinks      | Low sugar & diet soft drinks  | Fruit juices                  | Milk-based drinks             | Water                         | Beer                          | Lager                         | Cider                         | Wines                         | Spirits                       |
|------------------------------|-------------------------------|-------------------------------|-------------------------------|-------------------------------|-------------------------------|-------------------------------|-------------------------------|-------------------------------|-------------------------------|-------------------------------|-------------------------------|
| High sugar soft drinks       | <b>-0.54</b><br>[-0.68;-0.37] | <b>-0.06</b><br>[-0.14;-0.01] | -0.05<br>[-0.24;0.10]         | 0.02<br>[-0.17;0.21]          | <b>0.09</b><br>[0.02;0.16]    | <b>0.09</b><br>[0.02;0.17]    | -0.03<br>[-0.13;0.06]         | 0.04<br>[-0.09;0.18]          | -0.05<br>[-0.14;0.04]         | <b>-0.22</b><br>[-0.39;-0.04] | 0.04<br>[-0.07;0.14]          |
| Medium sugar soft drinks     | -0.18<br>[-0.57;0.32]         | <b>-0.76</b><br>[-0.92;-0.60] | 0.31<br>[-0.05;0.90]          | -0.12<br>[-0.52;0.33]         | -0.03<br>[-0.20;0.19]         | 0.1<br>[-0.11;0.28]           | 0.1<br>[-0.20;0.35]           | -0.03<br>[-0.43;0.30]         | -0.09<br>[-0.37;0.15]         | -0.21<br>[-0.78;0.20]         | 0.18<br>[-0.11;0.46]          |
| Low sugar & diet soft drinks | 0.04<br>[-0.06;0.16]          | 0.02<br>[-0.02;0.07]          | <b>-0.53</b><br>[-0.67;-0.42] | 0.02<br>[-0.10;0.16]          | 0.03<br>[-0.02;0.09]          | -0.02<br>[-0.07;0.03]         | 0.04<br>[-0.03;0.12]          | 0.08<br>[-0.01;0.17]          | -0.01<br>[-0.07;0.05]         | -0.04<br>[-0.16;0.10]         | -0.04<br>[-0.10;0.03]         |
| Fruit juices                 | 0.18<br>[0;0.32]              | <b>-0.08</b><br>[-0.14;-0.03] | <b>-0.17</b><br>[-0.32;-0.01] | <b>-0.42</b><br>[-0.58;-0.23] | -0.02<br>[-0.09;0.04]         | -0.02<br>[-0.10;0.05]         | 0.06<br>[-0.05;0.15]          | 0.07<br>[-0.02;0.19]          | 0.01<br>[-0.06;0.10]          | <b>-0.21</b><br>[-0.36;-0.04] | 0.04<br>[-0.06;0.15]          |
| Milk-based drinks            | -0.32<br>[-0.93;0.28]         | -0.08<br>[-0.30;0.12]         | <b>0.65</b><br>[0.16;1.12]    | -0.32<br>[-0.98;0.34]         | <b>-0.67</b><br>[-0.97;-0.41] | 0.03<br>[-0.16;0.27]          | -0.06<br>[-0.40;0.30]         | -0.4<br>[-0.81;0.10]          | -0.07<br>[-0.40;0.18]         | 0.38<br>[-0.21;0.10]          | -0.10<br>[-0.40;0.28]         |
| Water                        | -0.15<br>[-0.49;0.13]         | -0.06<br>[-0.23;0.07]         | <b>0.43</b><br>[0.08;0.82]    | 0.14<br>[-0.26;0.53]          | -0.05<br>[-0.23;0.13]         | <b>-0.92</b><br>[-1.09;-0.76] | -0.08<br>[-0.30;0.10]         | -0.01<br>[-0.24;0.34]         | -0.06<br>[-0.22;0.18]         | <b>-0.38</b><br>[-0.80;-0.04] | <b>0.38</b><br>[0.17;0.61]    |
| Beer                         | 0.23<br>[-0.10;0.49]          | -0.11<br>[-0.23;0.01]         | <b>0.42</b><br>[0.10;0.72]    | 0.37<br>[-0.01;0.81]          | -0.05<br>[-0.18;0.14]         | 0<br>[-0.11;0.13]             | <b>-1.02</b><br>[-1.23;-0.81] | -0.04<br>[-0.31;0.19]         | 0.01<br>[-0.14;0.19]          | <b>-0.39</b><br>[-0.78;-0.03] | -0.20<br>[-0.42;0.05]         |
| Lager                        | 0.06<br>[-0.15;0.36]          | <b>-0.14</b><br>[-0.25;-0.04] | <b>0.3</b><br>[0.08;0.54]     | 0.22<br>[-0.04;0.47]          | 0.09<br>[-0.01;0.22]          | 0.09<br>[-0.01;0.19]          | -0.06<br>[-0.18;0.09]         | <b>-1.02</b><br>[-1.21;-0.84] | <b>0.16</b><br>[0.04;0.29]    | <b>-0.5</b><br>[-0.79;-0.28]  | 0.03<br>[-0.11;0.18]          |
| Cider                        | <b>-0.52</b><br>[-0.93;-0.16] | 0.06<br>[-0.09;0.18]          | <b>0.33</b><br>[0.03;0.68]    | 0.03<br>[-0.27;0.56]          | -0.02<br>[-0.18;0.17]         | 0.11<br>[-0.05;0.25]          | -0.09<br>[-0.33;0.15]         | 0.11<br>[-0.16;0.39]          | <b>-0.84</b><br>[-1.04;-0.65] | -0.11<br>[-0.53;0.25]         | 0.09<br>[-0.19;0.33]          |
| Wines                        | -0.03<br>[-0.15;0.08]         | -0.02<br>[-0.06;0.02]         | <b>0.13</b><br>[0.01;0.24]    | -0.04<br>[-0.15;0.10]         | -0.04<br>[-0.1;0.01]          | -0.05<br>[-0.10;0]            | -0.01<br>[-0.07;0.06]         | 0.01<br>[-0.09;0.09]          | -0.03<br>[-0.09;0.04]         | <b>-0.7</b><br>[-0.83;-0.55]  | <b>-0.21</b><br>[-0.28;-0.14] |
| Spirits                      | 0.10<br>[-0.26;0.49]          | <b>0.25</b><br>[0.10;0.42]    | <b>-0.76</b><br>[-1.16;-0.4]  | -0.34<br>[-0.77;0.11]         | -0.15<br>[-0.34;0]            | -0.13<br>[-0.3;0.02]          | 0.10<br>[-0.16;0.33]          | 0.03<br>[-0.26;0.34]          | -0.06<br>[-0.27;0.13]         | <b>0.57</b><br>[0.18;1.01]    | <b>-1.03</b><br>[-1.32;-0.82] |

N=89,535; bias corrected 95% CI in parentheses, based on bootstrapped standard errors. Elasticities in bold mark those significant based on CI excluding zero.
